# Supplementary material for: Combining Shigella Tn-seq data with gold-standard E. coli gene deletion data suggests rare transitions between essential and non-essential gene functionality
Source: PubMed Central journal article supplement (PMC5011829; doi:10.1186/s12866-016-0818-0), 2016-09-06

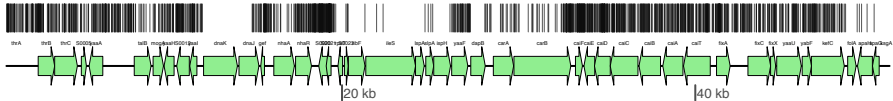

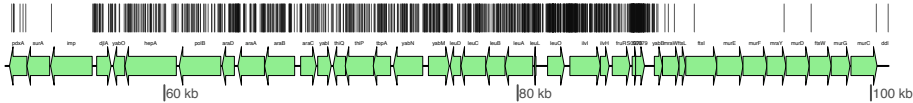

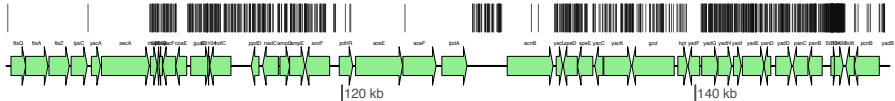

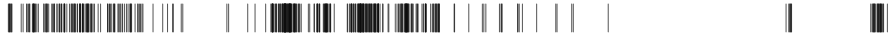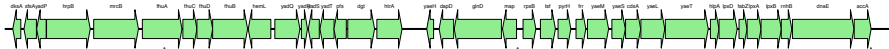

160 kb

180 kb

200 kb

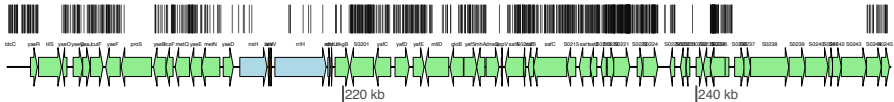

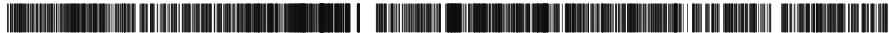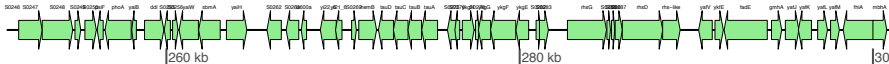

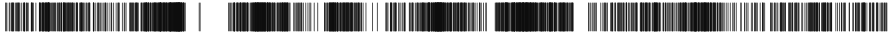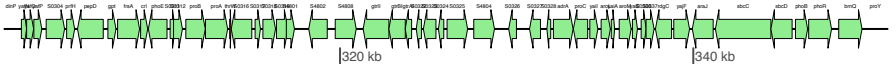

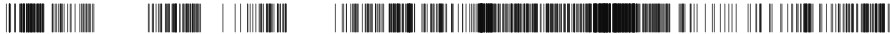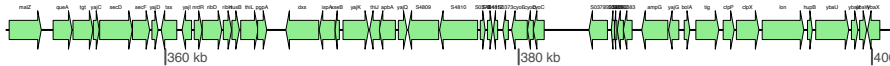



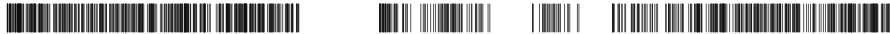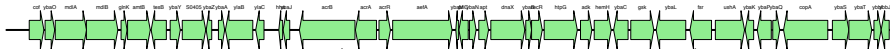

|420 kb

|440 kb

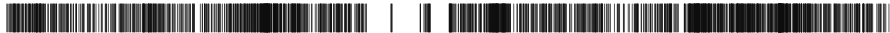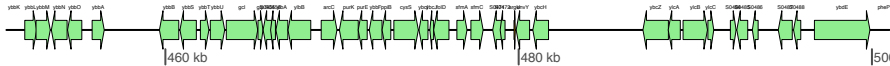

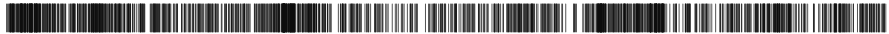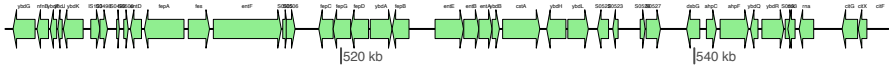

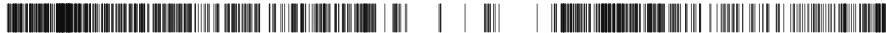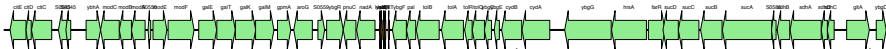

560 kb

580 kb

600 kb

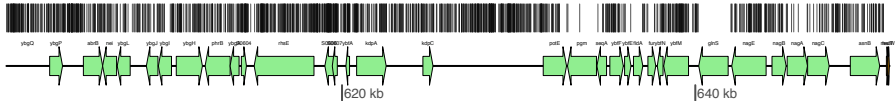

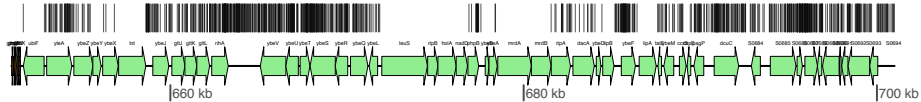

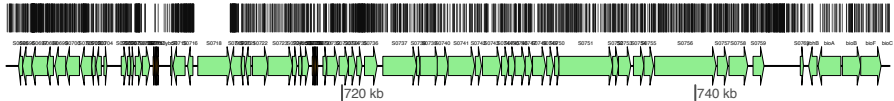

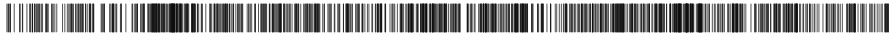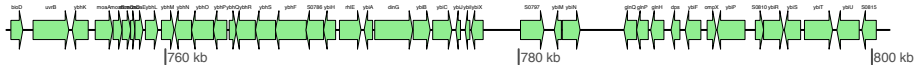



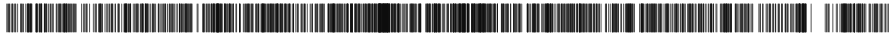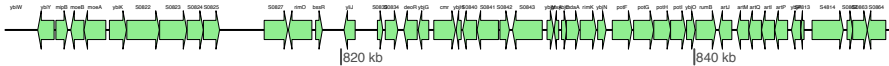

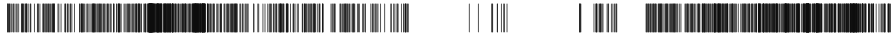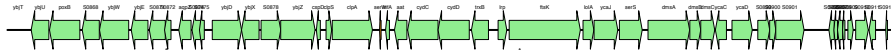

860 kb

880 kb

900 kb

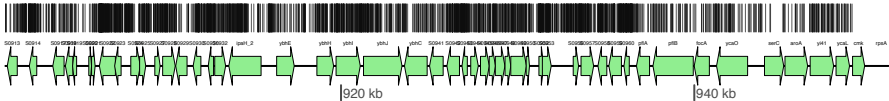

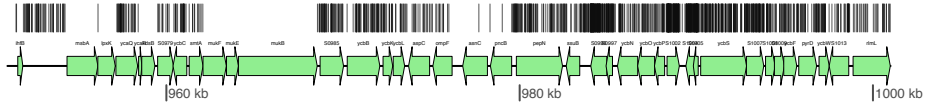

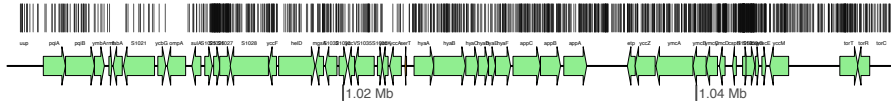

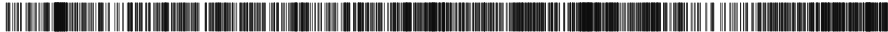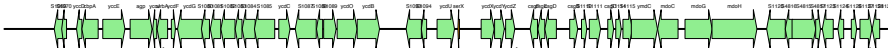

1.06 Mb

1.08 Mb

1.1 Mb

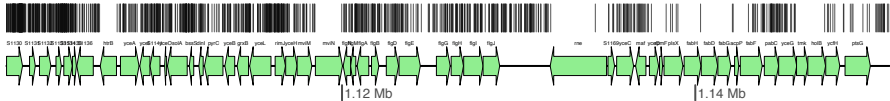

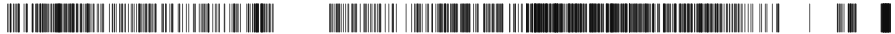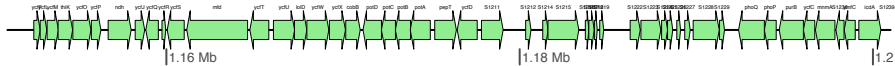



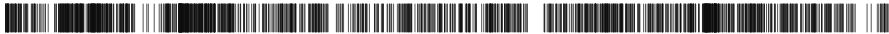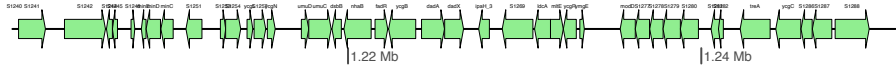

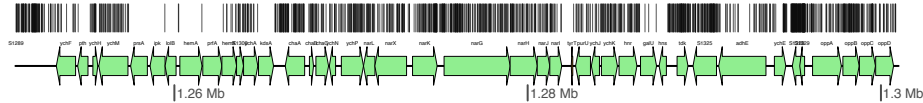

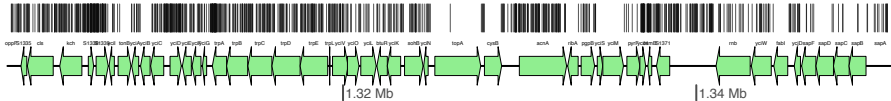

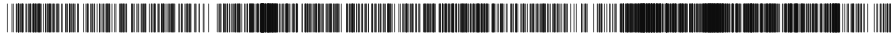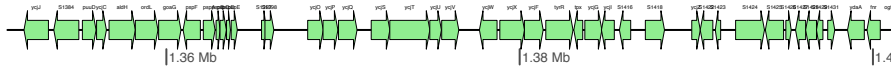

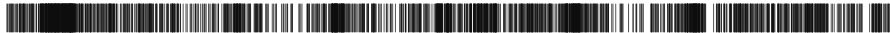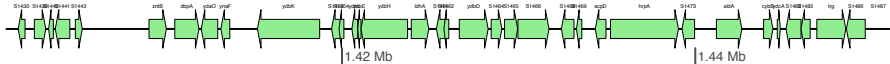

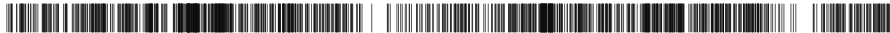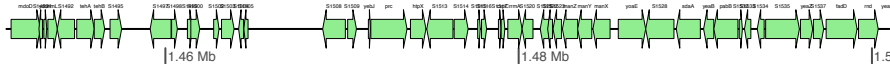

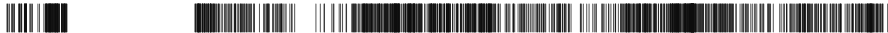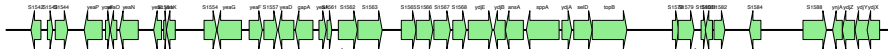

1.52 Mb

1.54 Mb

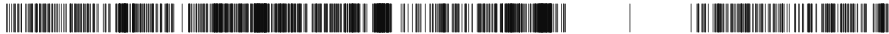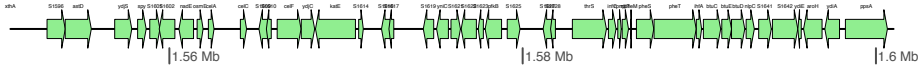



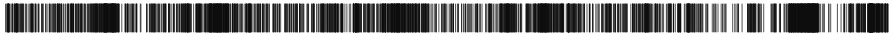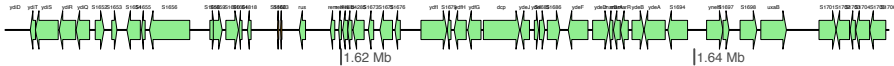

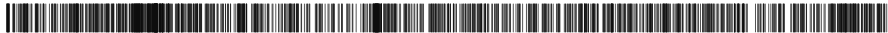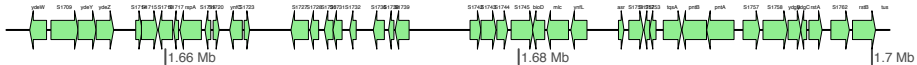

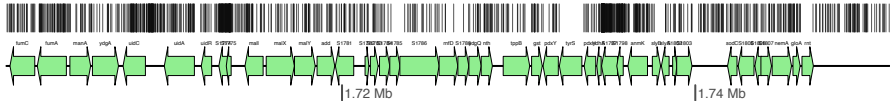

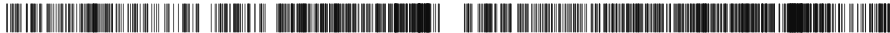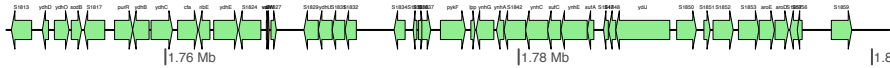

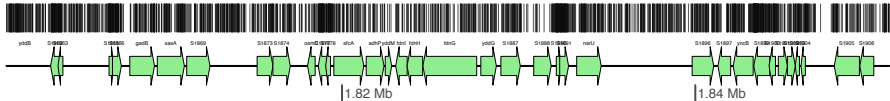

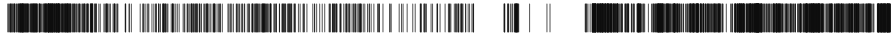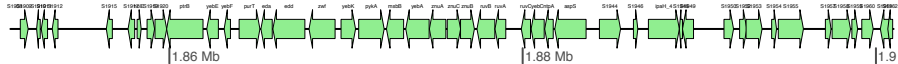

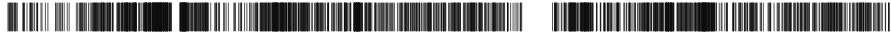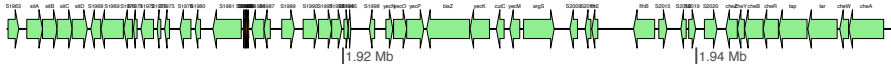

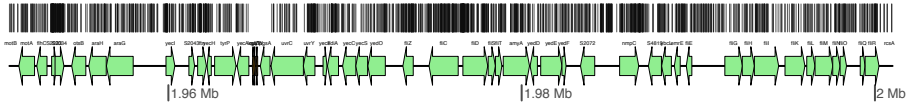



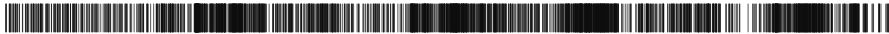

52099 yedI yedA var dcm 52102-52103-52104-52105-52106-52109 yedU yedV yedW 52114 52115 52117 52118 ipaH\_5 52121 52122 52124 52125 52127 52128 52130 52131 52132 52134 52135 52140 52141 52142 52143 52144 52145 52146 52147 52148 52150 52151 52152 52153 52154 52155 52156 52157 52158 amn 52161 varW

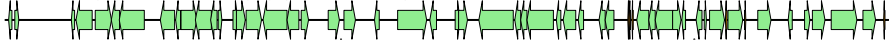

2.02 Mb

2.04 Mb

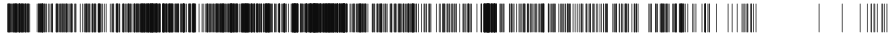

asn1cbl nac asn1asrK cobT cobS S2175017802as629b yeoK S2175017802as629b S2184 S21852187 S21882291 abcE yeeDyeeE yeeF yeeY S2198 S219998M hisG hisD hisC hisB hisH hisA hisF hisI wcdE gnd S22021822H S2218b1rb1 rbc rbG rbf rbe rbc rba rbd

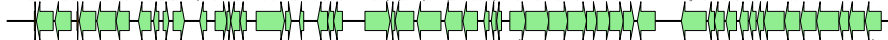

2.06 Mb

2.08 Mb

2.1 Mb

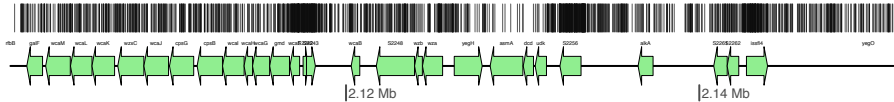

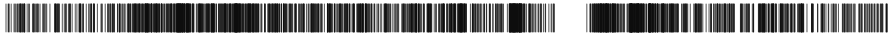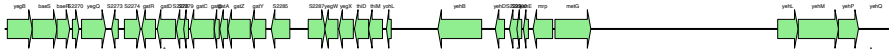

| 2.16 Mb

| 2.18 Mb

| 2.2 Mb

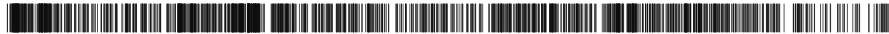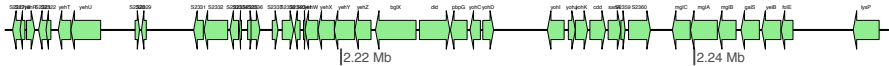

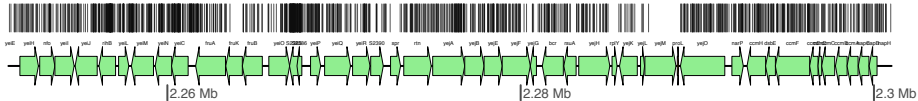

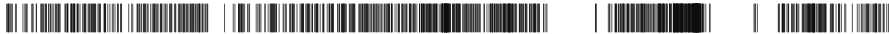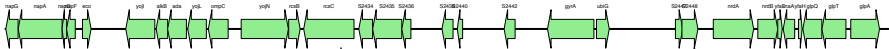

2.32 Mb

2.34 Mb

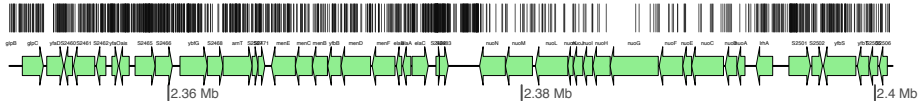



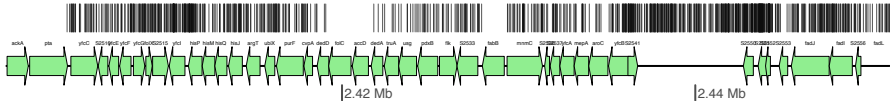

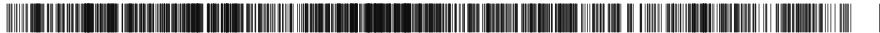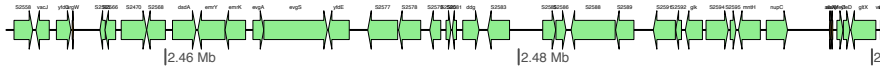



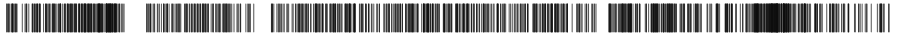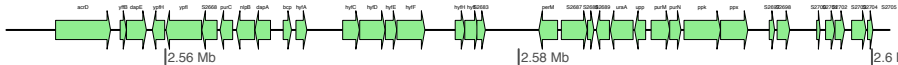

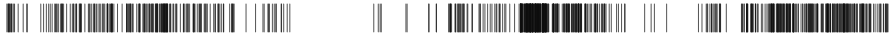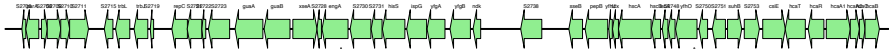

2.62 Mb

2.64 Mb

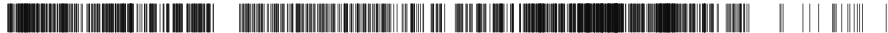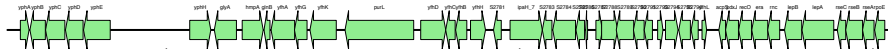

2.66 Mb

2.68 Mb

2.7 Mb

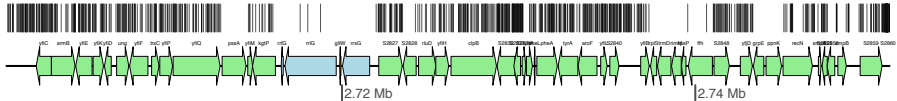

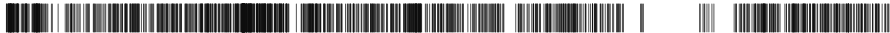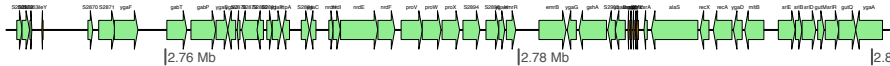







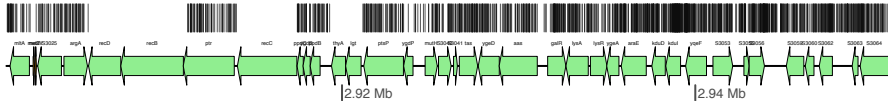

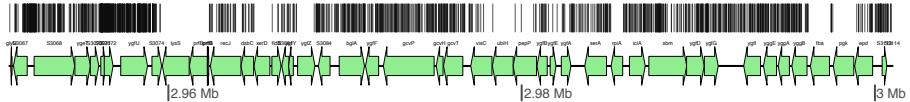

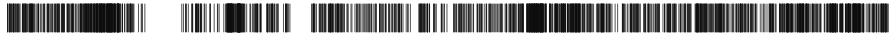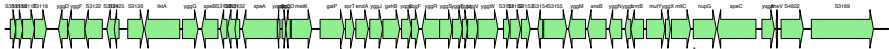

3.02 Mb

3.04 Mb

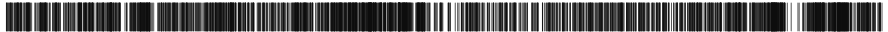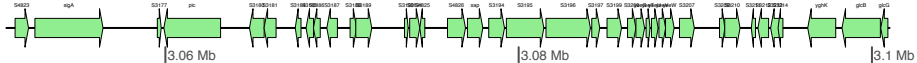

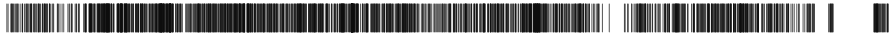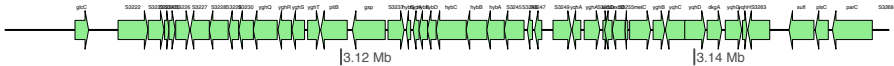

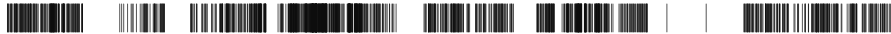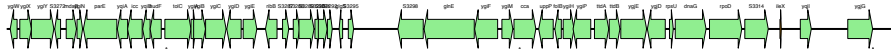

3.16 Mb

3.18 Mb

3.2 Mb



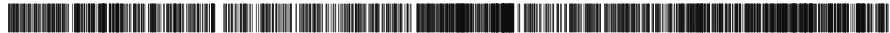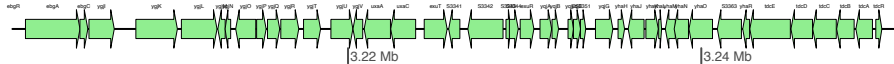

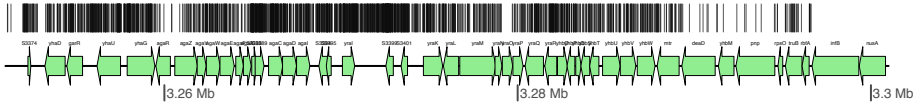

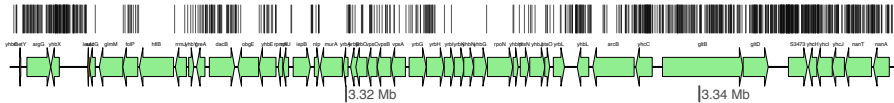

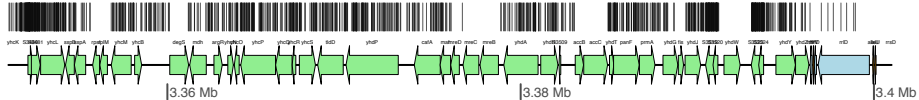

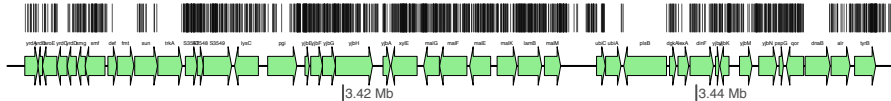

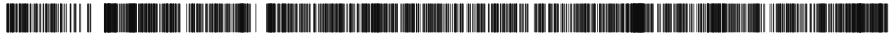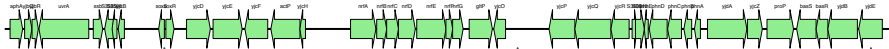

3.46 Mb

3.48 Mb

3.5 Mb

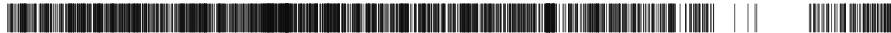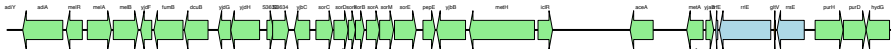

3.52 Mb

3.54 Mb





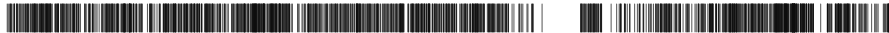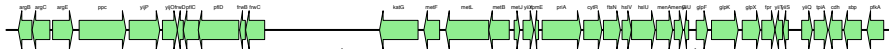

3.62 Mb

3.64 Mb

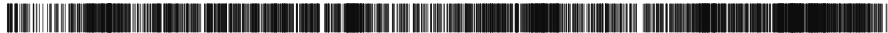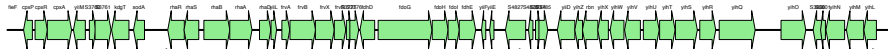

3.66 Mb

3.68 Mb

3.7 Mb

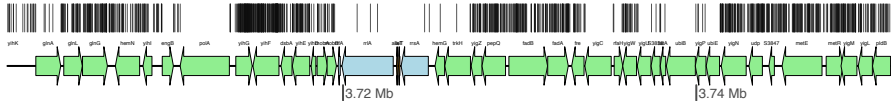

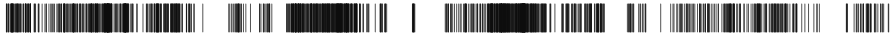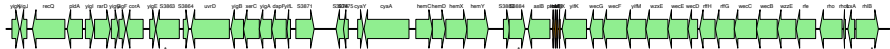

3.76 Mb

3.78 Mb

3.8 Mb

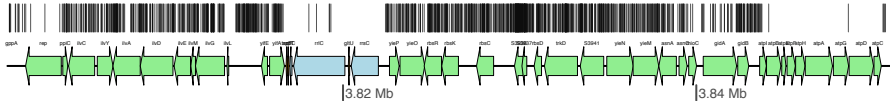

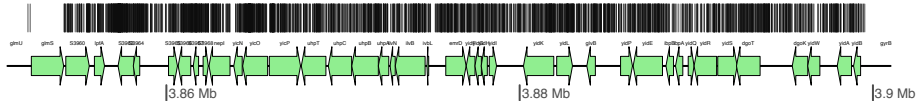

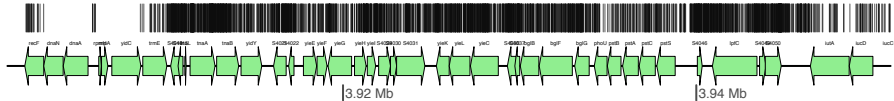

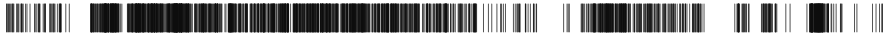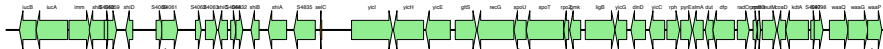

3.96 Mb

3.98 Mb

4 Mb



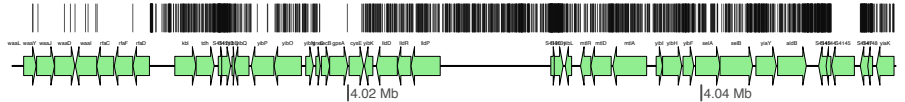

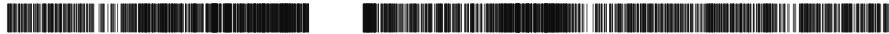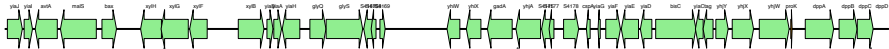

4.06 Mb

4.08 Mb

4.1 Mb

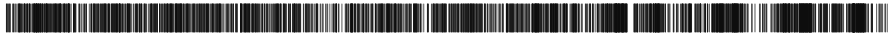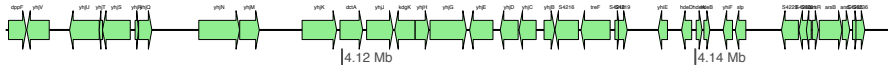

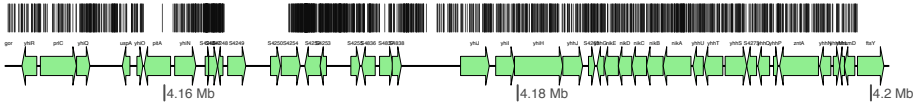

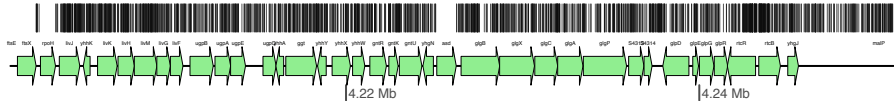

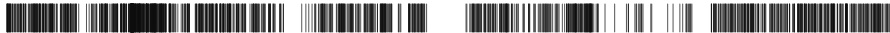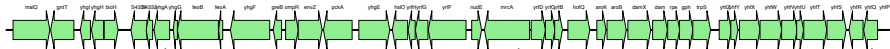

4.26 Mb

4.28 Mb

4.3 Mb

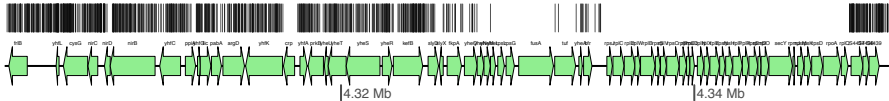

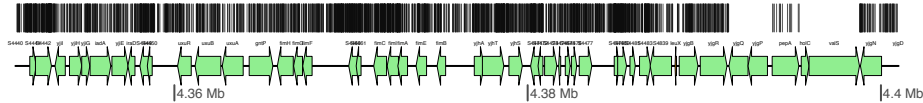



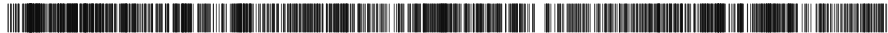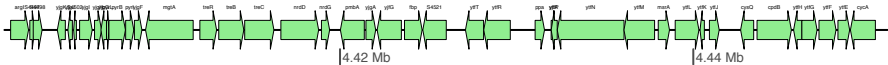

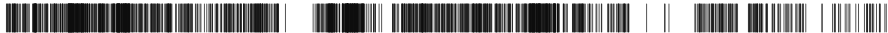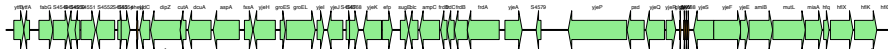

4.46 Mb

4.48 Mb

4.5 Mb



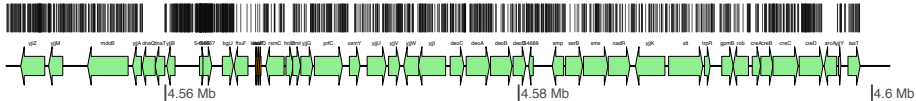

Supplement: 12866_2016_818_MOESM2_ESM.pdf [file 12866_2016_818_MOESM2_ESM.pdf]
