# Supplementary material for: Combining Shigella Tn-seq data with gold-standard E. coli gene deletion data suggests rare transitions between essential and non-essential gene functionality
Source: PubMed Central journal article supplement (PMC5011829; doi:10.1186/s12866-016-0818-0), 2016-09-06

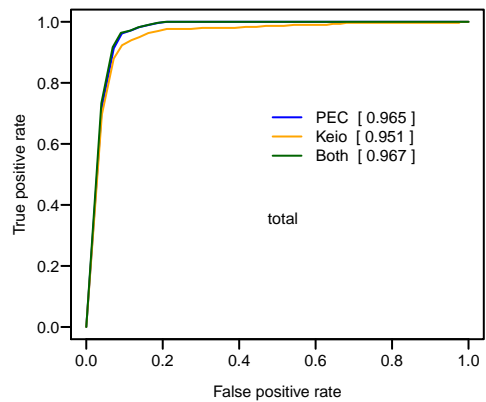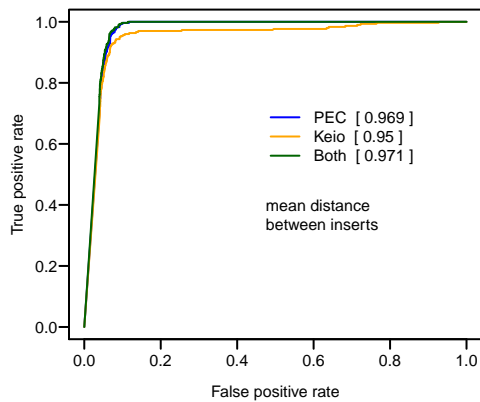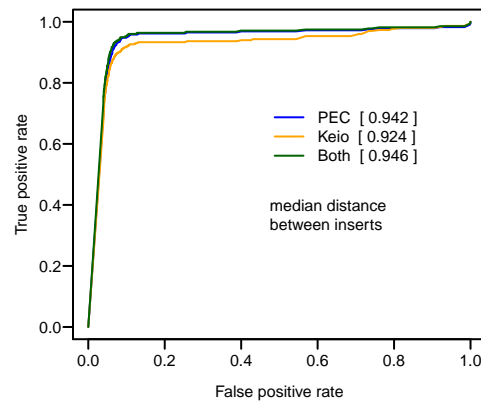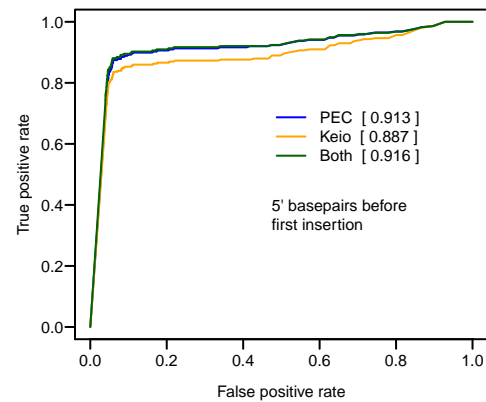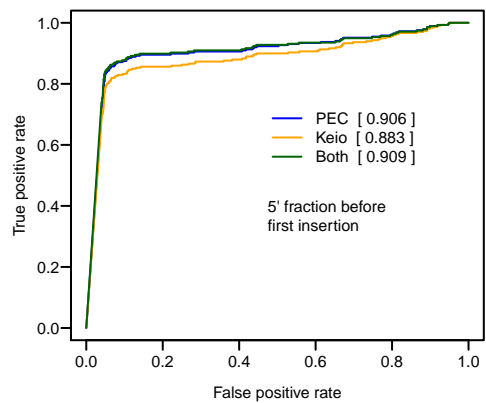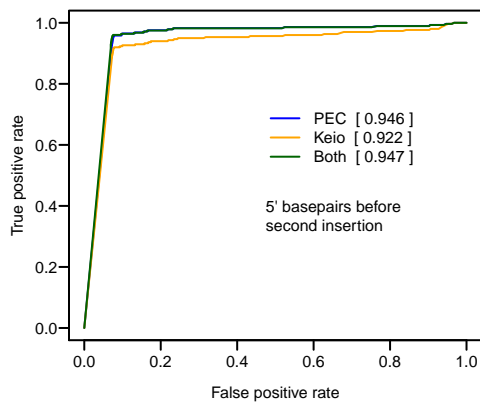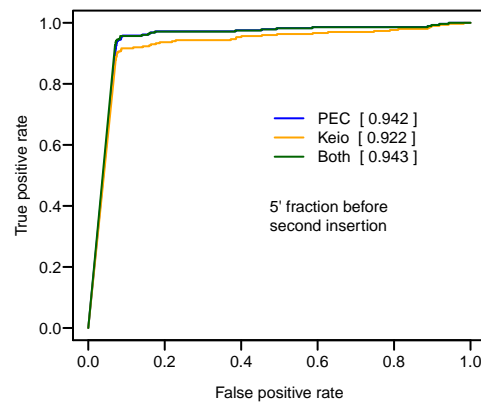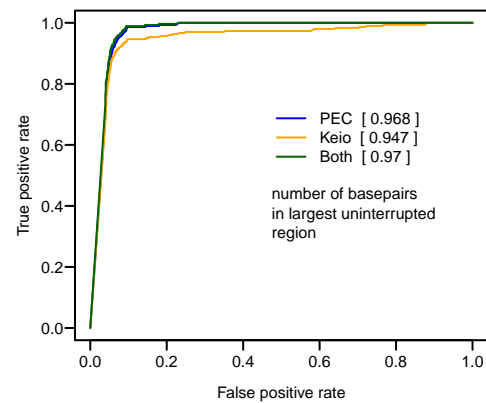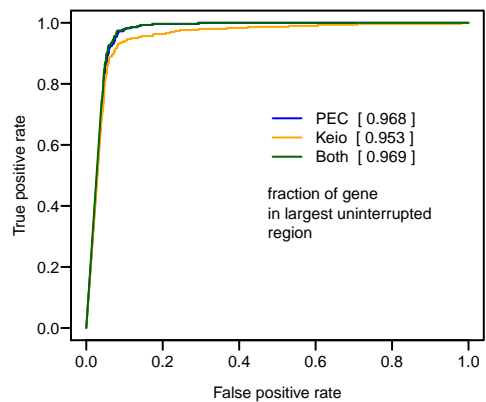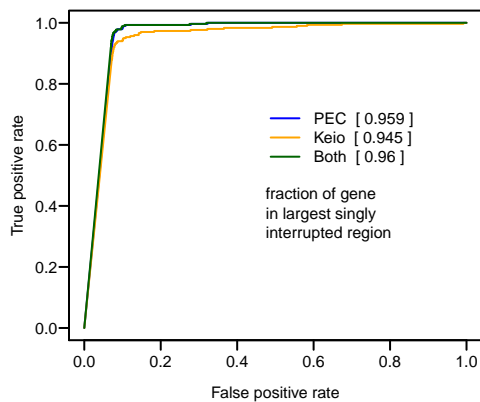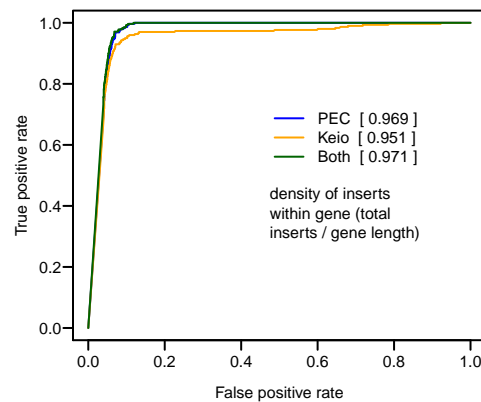

Supplement: 12866_2016_818_MOESM4_ESM.pdf [file 12866_2016_818_MOESM4_ESM.pdf]
