# Supplementary material for: Combining Shigella Tn-seq data with gold-standard E. coli gene deletion data suggests rare transitions between essential and non-essential gene functionality
Source: PubMed Central journal article supplement (PMC5011829; doi:10.1186/s12866-016-0818-0), 2016-09-06
Supplement: 12866_2016_818_MOESM9_ESM.pdf [file 12866_2016_818_MOESM9_ESM.pdf]

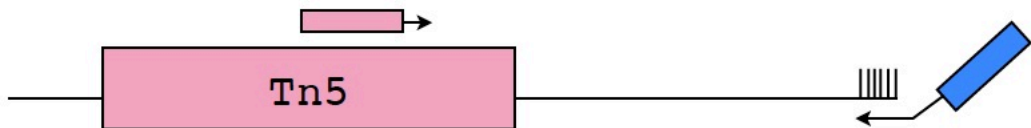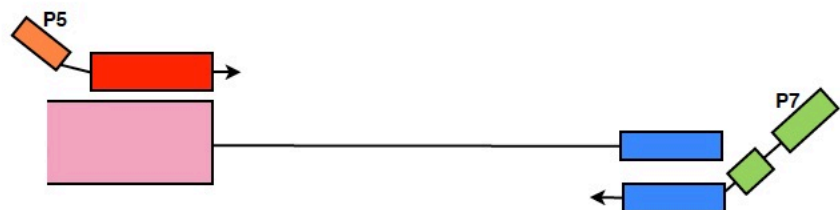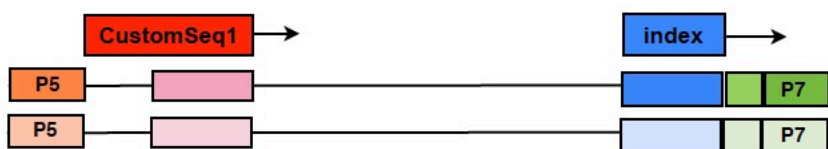

double stranded PCR product,  
gel purify band/smear at (300-400bp)  
(insert at 200-300bp)

# 1: Arbitrary PCR

using phusion PCR enzyme, so that no A's added at 3' end

1\_transp\_deep\_seq\_F1: TCTATCGCCTTCTTGACGAG

1\_transp\_deep\_seq\_R2: GTGACTGGAGTTCAGACGTGT GCTCTTCCGATCT NNNNNNNNNggtgc  
 1\_transp\_deep\_seq\_R3: GTGACTGGAGTTCAGACGTGT GCTCTTCCGATCT NNNNNNNNNgatata  
 1\_transp\_deep\_seq\_R4: GTGACTGGAGTTCAGACGTGT GCTCTTCCGATCT NNNNNNNNNnagtac

# 2: Nested PCR (addition of P7 and P5)

using phusion PCR enzyme, so that no A's added at 3' end

2\_transp\_deep\_seq\_FP5: AATGATACGGCGACCACCGAGATCT actggtcggcg CATTAGGGGATTCATCAG

Rev\_P7 6\_02  
 CAAGCAGAAGACGGCATAACGAGAT agtctt GTGACTGGAGTTCAGACGTGT  
 CAAGCAGAAGACGGCATAACGAGAT gtatct GTGACTGGAGTTCAGACGTGT  
 CAAGCAGAAGACGGCATAACGAGAT tcatgg GTGACTGGAGTTCAGACGTGT  
 CAAGCAGAAGACGGCATAACGAGAT cgcgac GTGACTGGAGTTCAGACGTGT  
 CAAGCAGAAGACGGCATAACGAGAT acgata GTGACTGGAGTTCAGACGTGT  
 CAAGCAGAAGACGGCATAACGAGAT tataga GTGACTGGAGTTCAGACGTGT

# 3: Sequencing on Illumina chip

transp\_deep\_seq\_Custom seq 1: actggtcggcgCATTAGGGGATTCATCAG

# 4: Barcode is read on Illumina chip

transp\_deep\_seq\_Index seq: GATCGGAAGAGCACACGTCTGAACTCCAGTCAC
